# Supplementary material for: Comparison of the effectiveness of two piperazine based nano-catalysts in the synthesis of benzoxazoles and benzimidazoles and use of the powerful one in the N-Boc protection of amines
Source: Royal Society of Chemistry journal article supplement (doi:10.1039/d4ra01300j), 2024-01-01
Supplement: d4ra01300j1.pdf [file d4ra01300j1.pdf]

di-tert-Butyl (sulfonylbis(1,3-phenylene))dicarbamate: FT-IR (KBr):  $\nu = 3333, 2981, 1730, 1700, 1595, 1533, 1480 \text{ cm}^{-1}$ .  $^1\text{H}$ NMR (500 MHz,  $\text{DMSO-d}_6$ )  $\sigma$ : 1.59 (9H, s,  $3\times\text{CH}_3$ ), 7.58-7.64 (2H, m, arom), 7.74 (1H, d,  $J=8 \text{ Hz}$ , arom), 8.28 (1H, s, arom), 9.92 (1H, s, NH)  $^{13}\text{C}$ NMR (100 MHz,  $\text{DMSO-d}_6$ ): 27.97, 79.80, 115.79, 120.55, 122.59, 130.18, 140.67, 141.48, 152.58.

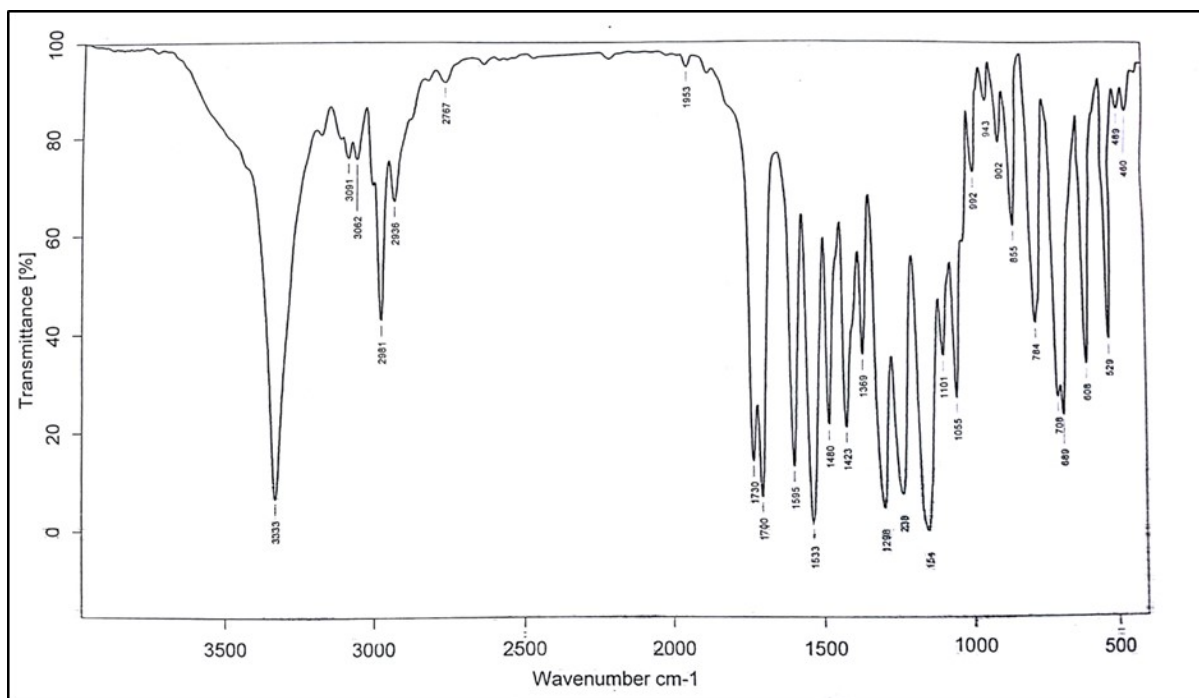

FT-IR spectrum of di-tert-Butyl (sulfonylbis(1,3-phenylene))dicarbamate

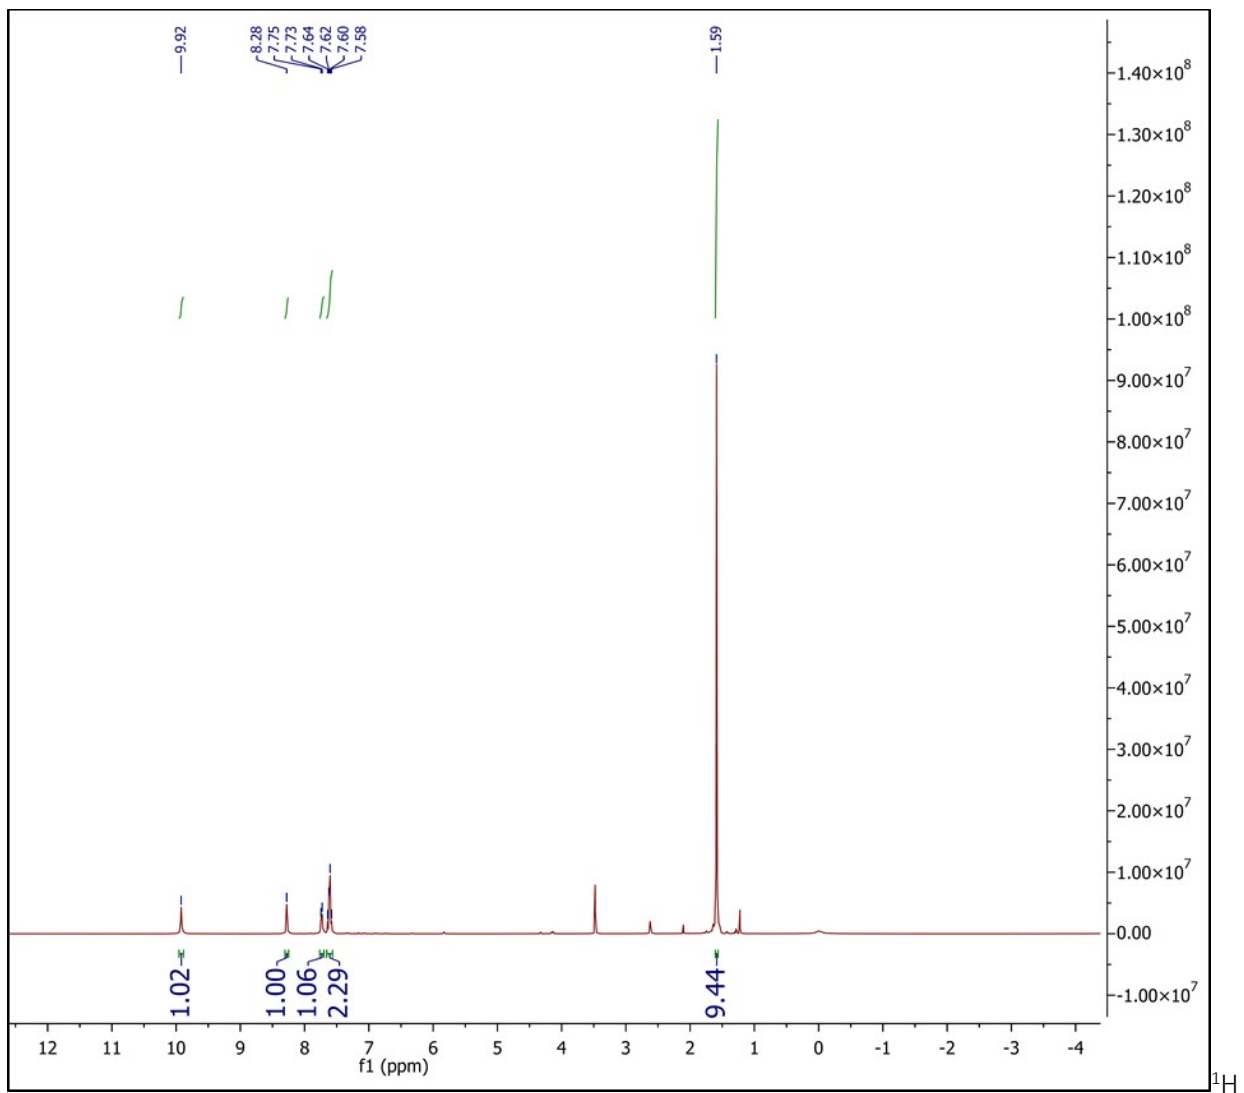

NMR spectrum of di-tert-Butyl (sulfonylbis(1,3-phenylene))dicarbamate

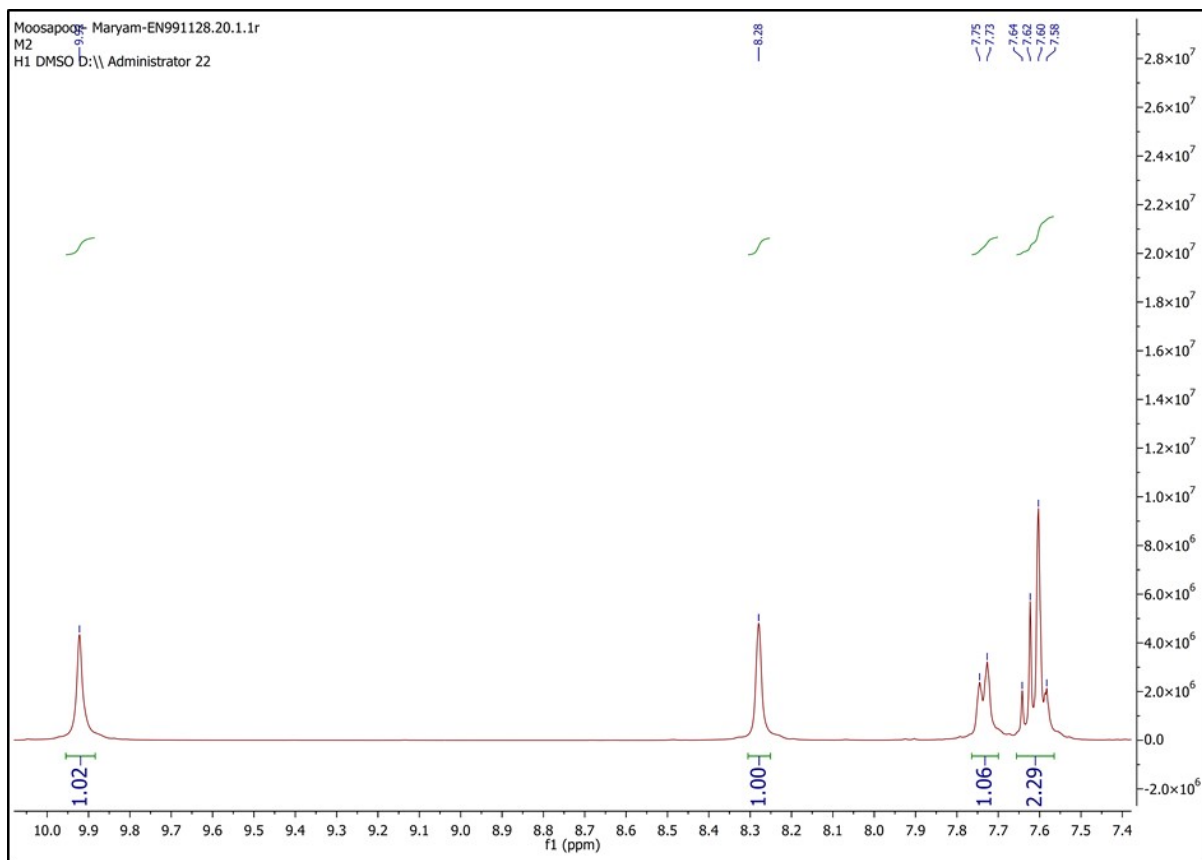

$^1\text{H}$ NMR spectrum of di-tert-Butyl (sulfonylbis(1,3-phenylene))dicarbamate

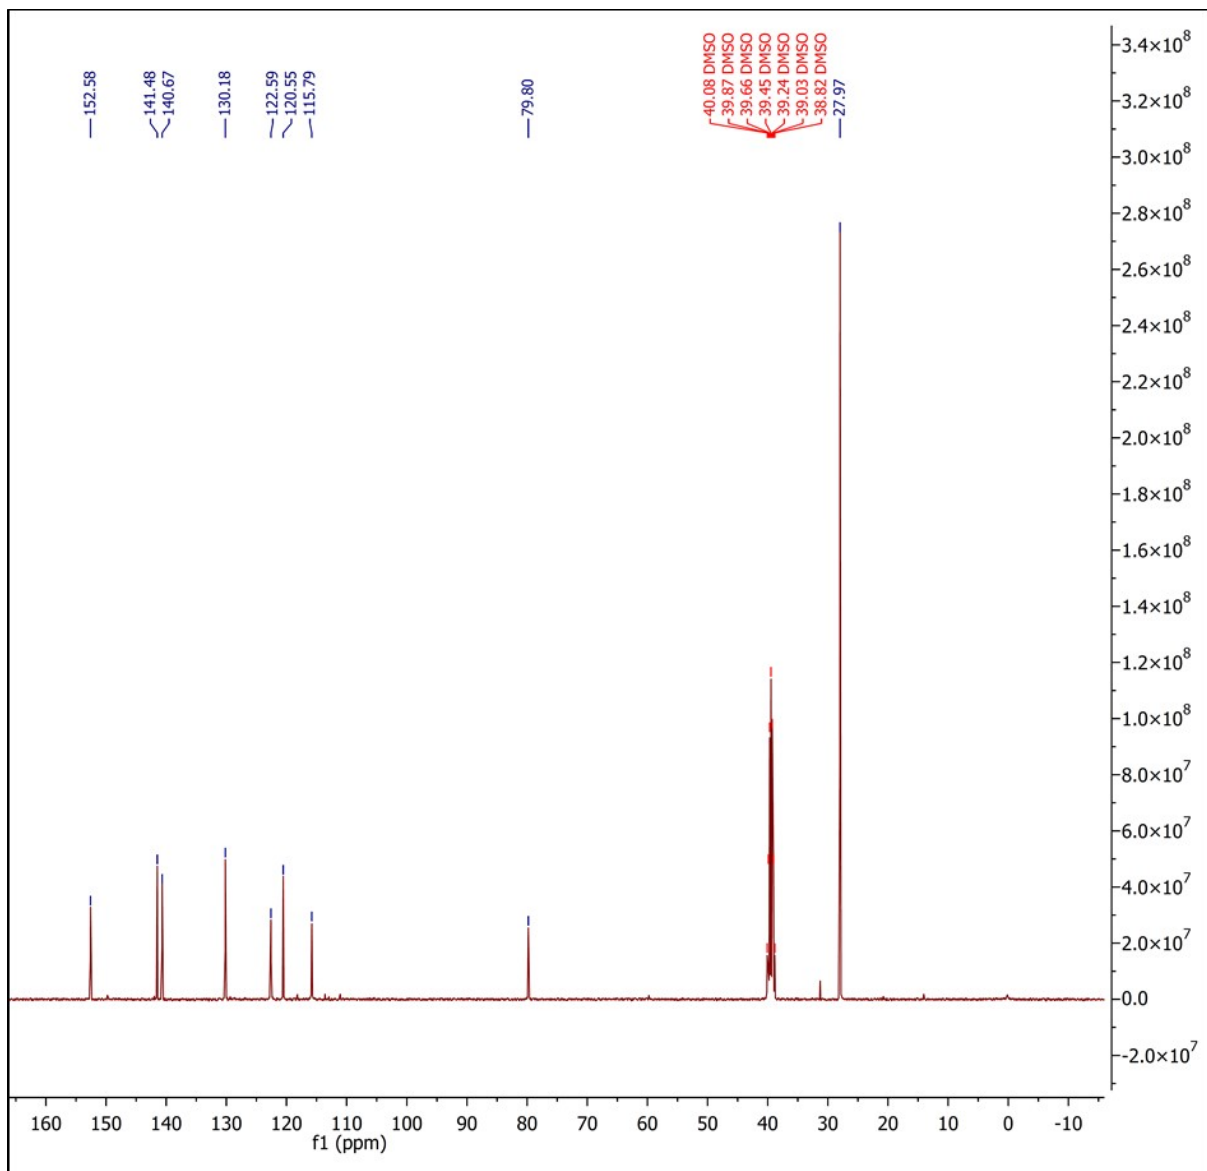

$^{13}\text{C}$ NMR spectrum of di-tert-Butyl (sulfonylbis(1,3-phenylene))dicarbamate

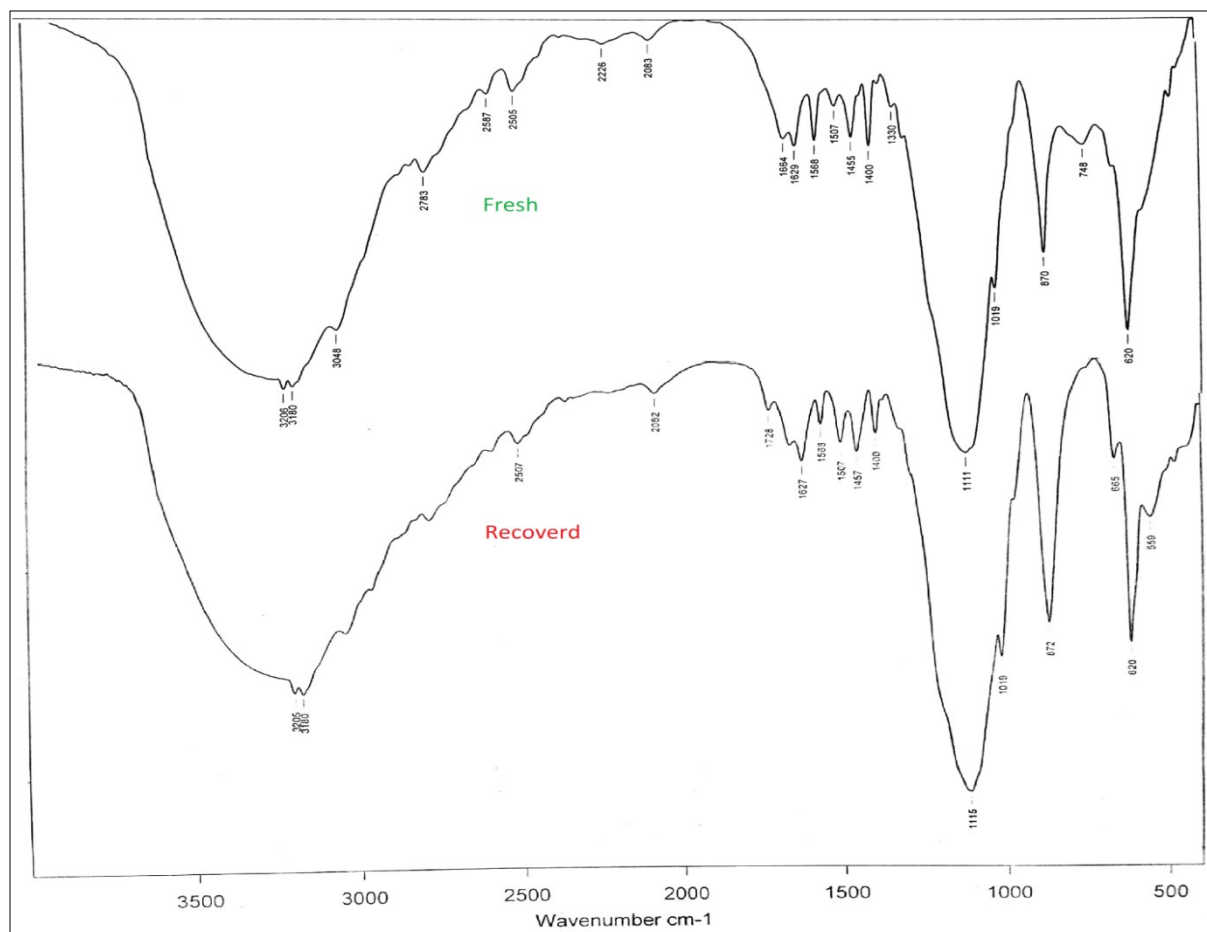

Figure FT-IR spectra of fresh PINZS (up) in comparison with its recovered form (down).
